### Clinical course long after atrial switch: a novel risk score for serious clinical events

O. Woudstra<sup>1</sup>, T.E. Zandstra<sup>2</sup>, R.F. Vogel<sup>1</sup>, A.P.J. Van Dijk<sup>3</sup>, H.W. Vliegen<sup>2</sup>, P. Kies<sup>2</sup>, M.R.M. Jongbloed<sup>2</sup>, A.D. Egorova<sup>2</sup>, P.A. Doevendans<sup>4</sup>, T.C. Konings<sup>5</sup>, B.J.M. Mulder<sup>1</sup>, M.W.T. Tanck<sup>1</sup>, F.J. Meijboom<sup>4</sup>, B.J. Bouma<sup>1</sup>

<sup>1</sup>Amsterdam UMC, University of Amsterdam, Amsterdam, Netherlands (The); <sup>2</sup>Leiden University Medical Center, Leiden, Netherlands (The); <sup>3</sup>University Medical Center St Radboud (UMCN), Nijmegen, Netherlands (The); <sup>4</sup>University Medical Center Utrecht, Utrecht, Netherlands (The); <sup>5</sup>Amsterdam UMC - Location VUmc, Amsterdam, Netherlands (The)

**Funding Acknowledgement:** Type of funding source: Foundation. Main funding source(s): Dutch Heart Foundation; Amsterdam University Fund

**Background:** Patients after atrial switch surgery for transposition of the great arteries (TGA-AtrSO) experience serious clinical events during adulthood, mainly heart failure and arrhythmias, but data on the emerging risks remain scarce.

**Purpose:** To assess the risk for events during the clinical course in adulthood of TGA-AtrSO patients and provide a novel risk score for event-free survival.

**Methods:** We reviewed medical records of TGA-AtrSO patients from five hospitals. Endpoints were all-cause mortality, heart failure (HF), defined as HF hospitalizations, heart transplantation, ventricular assist device implantation, or HF-related death, and symptomatic ventricular arrhythmias (VA). Predictors for event-free survival were examined to construct a prediction model using bootstrapping techniques.

**Results:** We followed 169 TGA-AtrSO patients (60% Mustard, age 28 [IQR 24–36] years) for 13 [IQR 9–16] years, during which 17 (10%) died, 34

(20%) had HF events, and 15 (9%) had VA events. Five-year risk of mortality, first HF event, and first VA increased from 1% each at age 25, to 7% (95% CI 4–10%), 17% (95% CI 10–25%), and 4% (95% CI 2–8%), respectively, at age 50. A prediction model combining age >30, prior VA, age >1 year at repair surgery, QRS duration >120ms, ≥mild LV dysfunction, and severe tricuspid regurgitation discriminated well between patients at low (<5%), medium (5–20%) and high (>20%) 5-year risk (optimism corrected C-statistic=0.84). Observed 5- and 10-year survival in low-risk patients were 100% and 99%, compared to only 45% and 19% in high-risk patients.

**Conclusion:** The clinical course of atrial switch patients increasingly consists of serious clinical events, especially heart failure. A novel risk score stratifying patients as low, medium, and high risk for event-free survival is presented, providing information on absolute individual risks which may support decisions for pharmacological and interventional management.

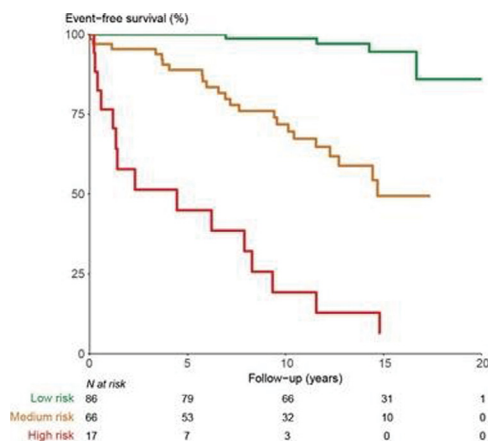

Figure 1. Observed event-free survival of patients with predicted low risk (<5% in 5 years), medium risk (5–20% in 5 years) and high risk (>20% in 5 years).
